# Supplementary material for: Novel Molecular and Computational Methods Improve the Accuracy of Insertion Site Analysis in Sleeping Beauty-Induced Tumors
Source: PLOS journal article supplement (doi:10.1371/journal.pone.0024668), 2011-09-13
Supplement: S2 (10.1371/journal.pone.0024668.s002) [file journal.pone.0024668.s002]

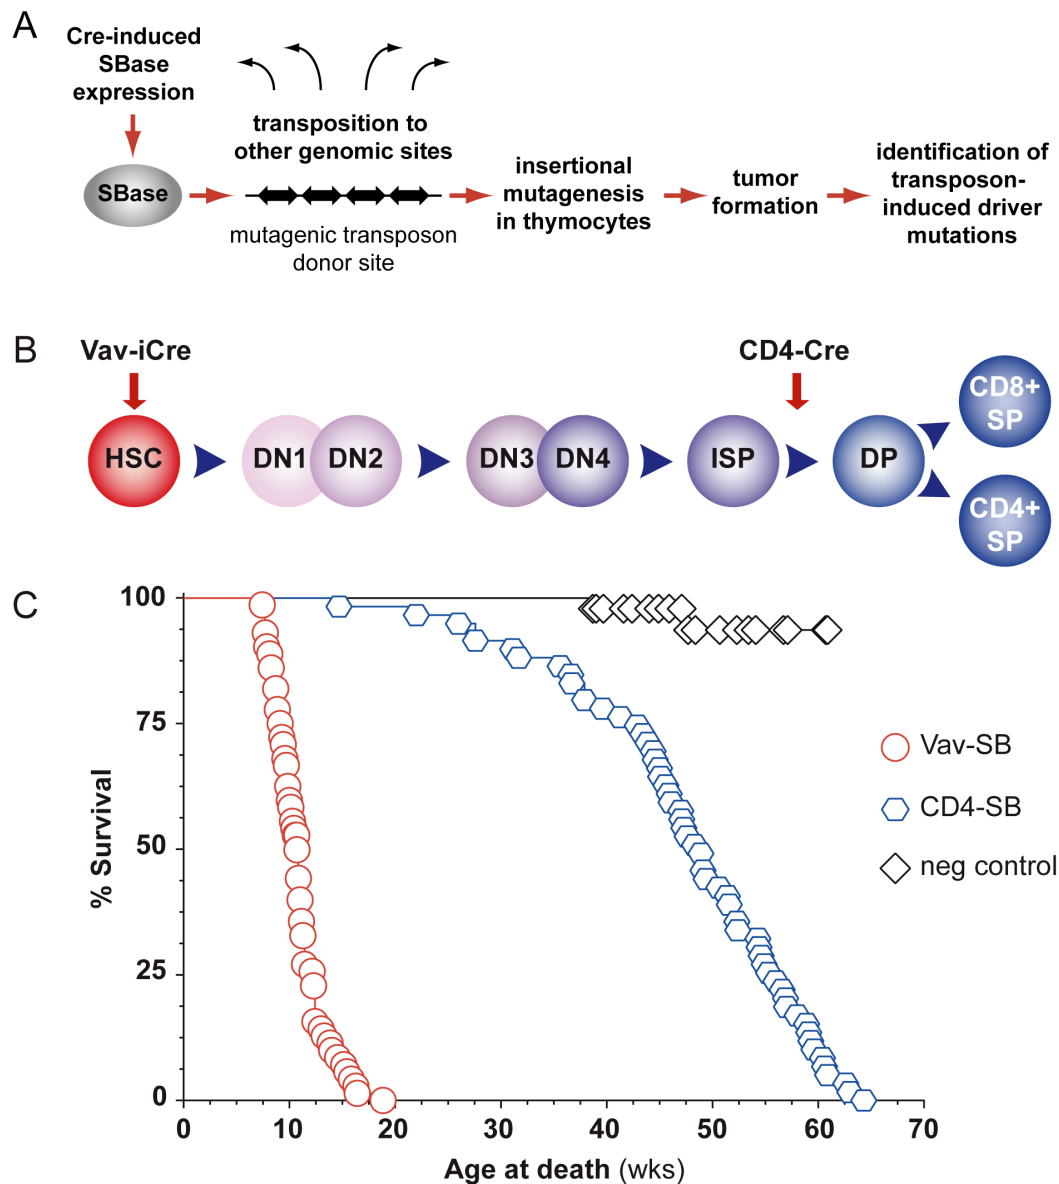

**Figure S2.** (A) Overview of Sleeping Beauty (SB) models of cancer. (B) We used a Cre-inducible SB transposon mutagenesis system to generate two distinct models of T-cell lymphoma in which mutagenesis was initiated in either hematopoietic stem cells (Vav-SB) or in nearly differentiated thymocytes (CD4-SB). (C) Tumors within Vav-SB and CD4-SB mice develop with different latencies and are driven by distinct mutations. The major findings of this work are described elsewhere (Berquam-Vrieze et al., submitted).
