# Supplementary material for: Novel Molecular and Computational Methods Improve the Accuracy of Insertion Site Analysis in Sleeping Beauty-Induced Tumors
Source: PLOS journal article supplement (doi:10.1371/journal.pone.0024668), 2011-09-13
Supplement: S5 (10.1371/journal.pone.0024668.s005) [file journal.pone.0024668.s005]

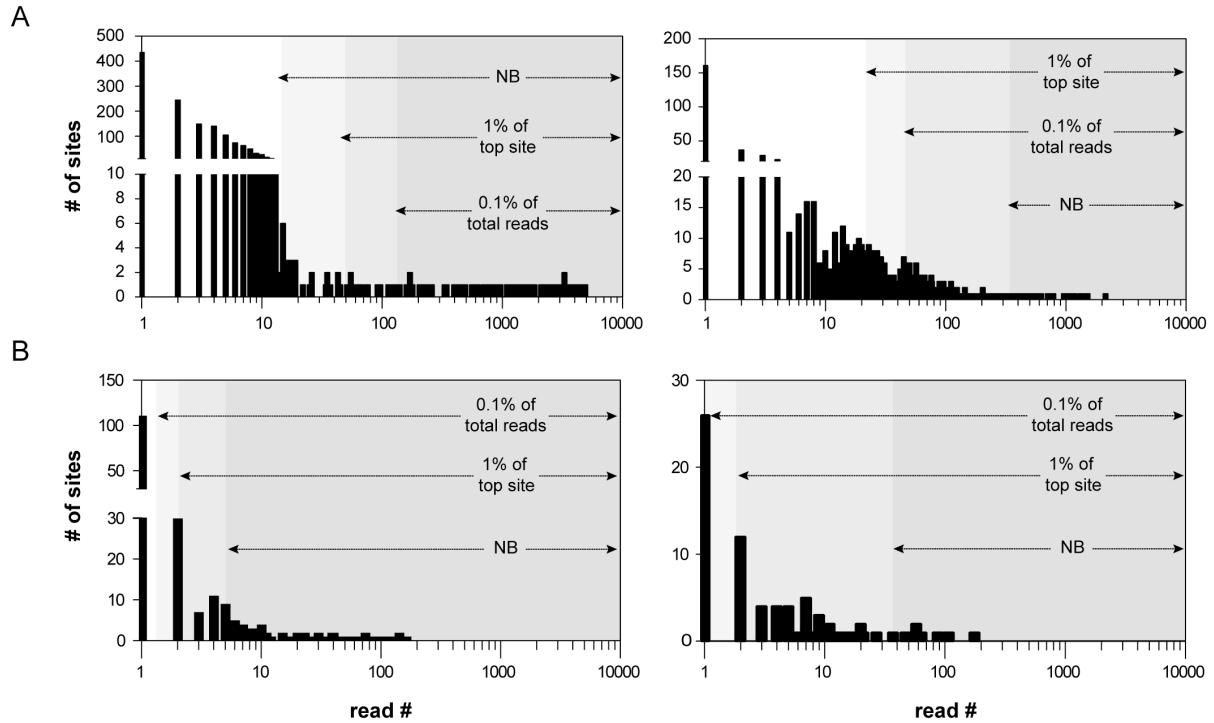

**Figure S5.** The read distribution is shown for two different samples that were analyzed by both Illumina (A) and 454 (B) LM-PCR. The increased sequence depth in the Illumina method apparently improves the signal to noise ratio and identifies more clonal insertion sites than 454 sequencing.
