# Supplementary material for: Novel Molecular and Computational Methods Improve the Accuracy of Insertion Site Analysis in Sleeping Beauty-Induced Tumors
Source: PLOS journal article supplement (doi:10.1371/journal.pone.0024668), 2011-09-13
Supplement: S9 (10.1371/journal.pone.0024668.s009) [file journal.pone.0024668.s009]

**Supplemental Table S2.** Comparison of cutoff methods in the identification of CIS and gCIS genes.

|        | NB         |     |    | 1% max     |     |    | 0.1% total |     |    | Dynamic    |     |    |
|--------|------------|-----|----|------------|-----|----|------------|-----|----|------------|-----|----|
|        | # of sites | CIS | %  | # of sites | CIS | %  | # of sites | CIS | %  | # of sites | CIS | %  |
| Vav-SB | 10,543     | 27  | 33 | 11,544     | 26  | 31 | 5,271      | 24  | 42 | 2,657      | 21  | 43 |
| CD4-SB | 21,700     | 72  | 24 | 25,517     | 77  | 23 | 4,561      | 48  | 29 | 3,735      | 44  | 34 |

|        | NB         |      |    | 1% max     |      |    | 0.1% total |      |    | Dynamic    |      |    |
|--------|------------|------|----|------------|------|----|------------|------|----|------------|------|----|
|        | # of sites | gCIS | %  | # of sites | gCIS | %  | # of sites | gCIS | %  | # of sites | gCIS | %  |
| Vav-SB | 10,543     | 43   | 30 | 11,544     | 29   | 28 | 5,271      | 43   | 26 | 2,657      | 30   | 37 |
| CD4-SB | 21,700     | 193  | 11 | 25,517     | 205  | 12 | 4,561      | 107  | 20 | 3,735      | 88   | 24 |

% = percentage of genes found in COSMIC and CGC databases (see Methods for definition of mutated COSMIC genes)
