# Supplementary material for: Novel Molecular and Computational Methods Improve the Accuracy of Insertion Site Analysis in Sleeping Beauty-Induced Tumors
Source: PLOS journal article supplement (doi:10.1371/journal.pone.0024668), 2011-09-13
Supplement: S11 (10.1371/journal.pone.0024668.s011) [file journal.pone.0024668.s011]

## ***Preparation of templates for Illumina sequencing***

### **Restriction digest**

1. Digest 1 µg of tumor DNA with *Nla*III (IRR) or *Alu*I (IRL). Do not use more than 2 µg of genomic DNA as this will lead to concatomerization of genomic fragments during the ligation step. Less than 1 µg of genomic DNA can be used, but the final volume should be scaled to maintain a similar DNA concentration in the reaction.

1 µL enzyme  
4 µL buffer  
4 µL 10X BSA (if needed)  
X µL H<sub>2</sub>O  
Y µL DNA  
**20 µL Total**

2. Incubate at least 3 hours at 37°C.
3. Heat inactivate enzyme.

The restriction digest can be incubated overnight. In this case, heat inactivation of the enzyme is not required. However, overnight incubation should be performed in a 37°C incubator (not a water bath) to prevent evaporation of the sample.

### **Ligation**

1. Prepare the adaptor by mixing the linker+ and linker- primers (each at 100µM) at a 1:1 ratio (see below for primer details). Linkers should be re-suspended at 100µM when stored. Heat the primer solution at 95°C for 5 minutes. Turn off the heat and allow the primers to slowly cool to room temperature. This allows the single-stranded oligos to anneal and form the double-stranded adaptor.

2. Set up ligations:

10.0 µL digested genomic DNA  
2.0 µL 10X NEB buffer 4  
2.0 µL 10 mM ATP  
1.5 µL adaptor  
1.0 µL T4 ligase (2,000U)  
3.5 µL dH<sub>2</sub>O  
**20.0 µL Total**

ligate 2-3 hours at room temperature or overnight at 16°C

3. Heat inactivate the T4 ligase (65°C for 10 minutes).
4. Digest ligation with *Bam*HI. This prevents the fragment from transposons within the concatomer from being amplified. *Bam*HI solution is made in a 10µL volume per tube. To each tube add:

1.0 µL *Bam*HI  
1.0 µL NEB Buffer 4  
3.0 µL 10X BSA  
5.0 µL dH<sub>2</sub>O  
**10.0 µL Total**

If the digest ligation is performed overnight at 37°C then column purification is not required as the *Bam*HI has degraded. Otherwise, a column purification is needed to remove the *Bam*HI enzyme.

**PCR**

|                 |                          |        |                             |            |
|-----------------|--------------------------|--------|-----------------------------|------------|
| 2.00 µL         | ligation reaction        | Step 1 | 98°C                        | 30 seconds |
| 10.00 µL        | 5X buffer                |        |                             |            |
| 1.00 µL         | 10 mM dNTPs              | Step 2 | 98°C                        | 10 seconds |
| 1.50 µL         | primer 1 (10 µM)         |        | 63°C                        | 20 seconds |
| 1.50 µL         | primer 2 (10 µM)         |        | 72°C                        | 30 seconds |
| 0.25 µL         | Phusion polymerase (NEB) |        | repeat Step 2 for 25 cycles |            |
| <u>33.75 µL</u> | <u>H<sub>2</sub>O</u>    |        |                             |            |
| 50.00 µL        | Total                    | Step 3 | 72°C                        | 2 minutes  |
|                 |                          |        | Hold at 4°C                 |            |

- dilute 3 µL of PCR reaction in 147 µL H<sub>2</sub>O (1:50 dilution)
- store remaining primary PCR reaction at 4°C

## Set up secondary PCR

|                 |                                                        |
|-----------------|--------------------------------------------------------|
| 4.00 µL         | diluted primary PCR (diluted 1:50 in H <sub>2</sub> O) |
| 20.00 µL        | 5X buffer                                              |
| 2.00 µL         | 10 mM dNTPs                                            |
| 3.00 µL         | nested primer 1 (10 µM)                                |
| 3.00 µL         | nested primer 2 (10 µM)                                |
| 1.00 µL         | Phusion polymerase (NEB)                               |
| <u>67.00 µL</u> | <u>H<sub>2</sub>O</u>                                  |
| 100.00 µL       | Total                                                  |

- perform PCR using the same cycle conditions as primary PCR (25 cycles)
- Analyze 25 µL of PCR product on 1.5% agarose gel.
- Purify remaining PCR product to remove excess primers/dNTPs.
- Determine concentration of purified PCR products (Nanodrop or UV spec is sufficient)
- Pipet 25 ng of each PCR product pool into a single tube to be run on a single lane on the Illumina platform
- Adjust the final concentration of the mixed sample to be ~20-25 ng/µL.
- Incubate the diluted products at 37-42°C for 30 minutes
- Submit sample for sequencing

**Primers to generate adaptors:**IRDRR adaptor

NlaIII linker+ 5'-GTAATACGACTCACTATAGGGCTCCGCTTAAGGGACCATG-3'

NlaIII linker- 5'-Phos-GTCCCTTAAGCGGAG-C3spacer-3'

IRDRL adaptor

AluI linker+ 5'-GTAATACGACTCACTATAGGGCTCCGCTTAAGGGAC-3'

AluI linker- 5'-Phos-GTCCCTTAAGCGGAG-C3spacer-3'

All adaptor primers are resuspended in STE\* buffer at 100µM. All PCR primers were used at 10 µM concentration. C3spacer modification is available from Integrated DNA Technologies.

**Primers for IRR amplification (NlaIII-digested DNA):**Primary PCR

IRR 5'GGATTAAATGTCAGGAATTGTGAAAA 3'

linker primer 5'GTAATACGACTCACTATAGGGC 3'

**Primers for IRL amplification (BfaI and AluI-digested):**Primary PCR

IRL 5'AAATTTGTGGAGTAGTTGAAAAACGA 3'

linker primer 5'GTAATACGACTCACTATAGGGC 3'

**Secondary PCR (for IRR and IRL)**

## IR-A1

5'AATGATACGGCGACCACCGAGATCTACACTCTTTCCCTACACGACGCTCTTCCGATCT(barcode)  
TGTATGTAACTTCCGACTTCAACTG

## Linker-A2

5'CAAGCAGAAGACGGCATACGAGCTCTTCCGATCTAGGGCTCCGCTTAAGGGAC 3'

see info on barcoded primers

**\*STE Buffer**

50 mM NaCl

10 mM Tris-Cl (pH 8.0)

1mM EDTA (pH 8.0)
